# Supplementary material
Source: MDPI journal article supplement (https://www.mdpi.com/1996-1073/14/1/9)
Supplement: s1 [file s1]

# Comparison of Pyrolysis Liquids from Continuous and Batch Biochar Production – Influence of Feedstock Evidenced by FTICR MS

**Wolfram Buss**<sup>1,2,\*†</sup>, **Jasmine Hertzog**<sup>3,\*†</sup>, **Julian Pietrzyk**<sup>1</sup>, **Vincent Carré**<sup>3</sup>, **C. Logan Mackay**<sup>4</sup>, **Frédéric Aubriet**<sup>3</sup> and **Ondřej Mašek**<sup>1,\*</sup>

<sup>1</sup> UK Biochar Research Centre, School of GeoSciences, University of Edinburgh, Crew Building, Alexander Crum, Brown Road, Edinburgh EH9 3FF, UK; julian.pietrzyk@mialgae.com

<sup>2</sup> Research School of Biology, Australian National University, 134 Linnaeus Way, Canberra 2601, Australia

<sup>3</sup> LCP-A2MC, FR 2843 Institut Jean Barriol de Chimie et Physique Moléculaires et Biomoléculaires, FR 3624 Réseau National de Spectrométrie de Masse FT-ICR à très Haut Champ, Université de Lorraine, ICPM, 1 Boulevard Arago, CEDEX 03, 57078 Metz, France; vincent.carre@univ-lorraine.fr (V.C.); frederic.aubriet@univ-lorraine.fr (F.A.)

<sup>4</sup> SIRCAMS, School of Chemistry, University of Edinburgh, Edinburgh EH9 3FJ, UK; lmackay@ed.ac.uk

\* Correspondence: wolfram.buss@anu.edu.au (W.B.); jasmine.hertzog@univ-rouen.fr (J.H.); ondrej.masek@ed.ac.uk (O.M.)

† Equal contributing authors.

Received: 10 November 2020; Accepted: 18 December 2020; Published: 22 December 2020

**Table S1.** Composition of bio-oil samples analysed by ESI (+/-) and APPI (+) FTICR MS with feature number and corresponding percentages per heteroatom class. SWP: softwood pellets; WSP: wheat straw pellets; 550 and 700 refer to the pyrolysis temperatures; III: pilot-scale unit. NOTE: in ESI (+), the compounds are observed in the form of protonated and sodium adducts. As part of this table, if one compound was observed in both configurations only one was considered.

| Samples    | ESI (-)   |        |           |        |           |        |           |        | ESI (+)   |        |           |        |
|------------|-----------|--------|-----------|--------|-----------|--------|-----------|--------|-----------|--------|-----------|--------|
|            | CHO       |        | CHON      |        | CHOS      |        | CHOB      |        | CHO       |        | CHON      |        |
|            | feature # | %      |
| SWP550-1   | 995       | 58.74% | 8         | 0.47%  | 391       | 23.08% | 300       | 17.71% | 1977      | 52.66% | 1777      | 47.34% |
| SWP550-2   | 1010      | 55.74% | 11        | 0.61%  | 460       | 25.39% | 331       | 18.27% | 2197      | 59.30% | 1508      | 40.70% |
| SWP700-1   | 924       | 60.39% | 9         | 0.59%  | 305       | 19.93% | 292       | 19.08% | 2442      | 59.03% | 1695      | 40.97% |
| SWP700-2   | 905       | 67.34% | 8         | 0.60%  | 135       | 10.04% | 296       | 22.02% | 2413      | 61.45% | 1514      | 38.55% |
| WSP550-1   | 859       | 48.45% | 266       | 15.00% | 329       | 18.56% | 319       | 17.99% | 1644      | 42.94% | 2185      | 57.06% |
| WSP550-2   | 992       | 51.96% | 296       | 15.51% | 256       | 13.41% | 365       | 19.12% | 2112      | 40.67% | 3081      | 59.33% |
| WSP700-1   | 912       | 48.98% | 328       | 17.62% | 264       | 14.18% | 358       | 19.23% | 2043      | 38.94% | 3203      | 61.06% |
| WSP700-2   | 1058      | 52.27% | 370       | 18.28% | 278       | 13.74% | 318       | 15.71% | 2027      | 38.48% | 3241      | 61.52% |
| SWP550-III | 994       | 69.17% | 5         | 0.35%  | 100       | 6.96%  | 338       | 23.52% | 1948      | 59.26% | 1339      | 40.74% |
| WSP550-III | 754       | 30.78% | 1468      | 59.92% | 121       | 4.94%  | 107       | 4.37%  | 1107      | 47.11% | 1243      | 52.89% |

| Samples    | APPI (+)  |       |           |        |           |       |           |        |           |       |
|------------|-----------|-------|-----------|--------|-----------|-------|-----------|--------|-----------|-------|
|            | CH        |       | CHO       |        | CHN       |       | CHON      |        | CHOS      |       |
|            | feature # | %     | feature # | %      | feature # | %     | feature # | %      | feature # | %     |
| SWP550-1   | 13        | 0.27% | 2599      | 53.24% | 243       | 4.98% | 1987      | 40.70% | 40        | 0.82% |
| SWP550-2   | 15        | 0.30% | 2412      | 48.20% | 299       | 5.98% | 2215      | 44.26% | 63        | 1.26% |
| SWP700-1   | 15        | 0.34% | 2438      | 55.94% | 202       | 4.64% | 1664      | 38.18% | 39        | 0.89% |
| SWP700-2   | 21        | 0.41% | 2849      | 55.62% | 247       | 4.82% | 1962      | 38.31% | 43        | 0.84% |
| WSP550-1   | 13        | 0.28% | 1199      | 26.26% | 160       | 3.50% | 3134      | 68.64% | 60        | 1.31% |
| WSP550-2   | 17        | 0.32% | 1557      | 28.99% | 218       | 4.06% | 3456      | 64.35% | 123       | 2.29% |
| WSP700-1   | 12        | 0.24% | 1244      | 25.07% | 166       | 3.35% | 3449      | 69.51% | 91        | 1.83% |
| WSP700-2   | 68        | 1.24% | 1615      | 29.39% | 206       | 3.75% | 3386      | 61.62% | 220       | 4.00% |
| SWP550-III | 53        | 0.93% | 2603      | 45.53% | 250       | 4.37% | 2683      | 46.93% | 128       | 2.24% |
| WSP550-III | 132       | 2.81% | 815       | 17.38% | 184       | 3.92% | 3527      | 75.20% | 32        | 0.68% |

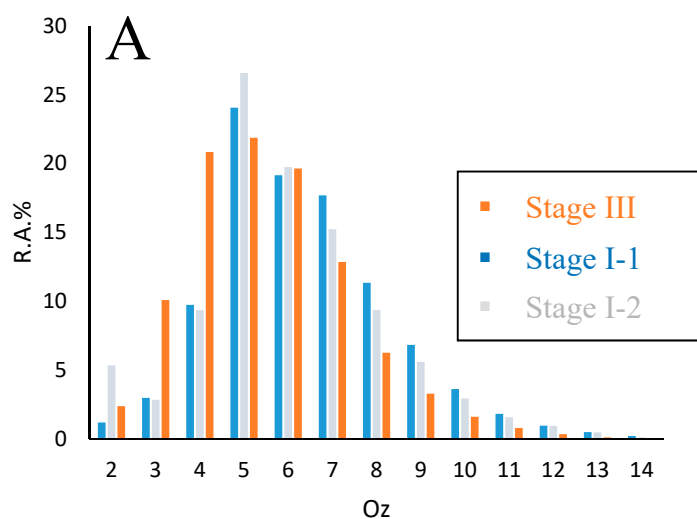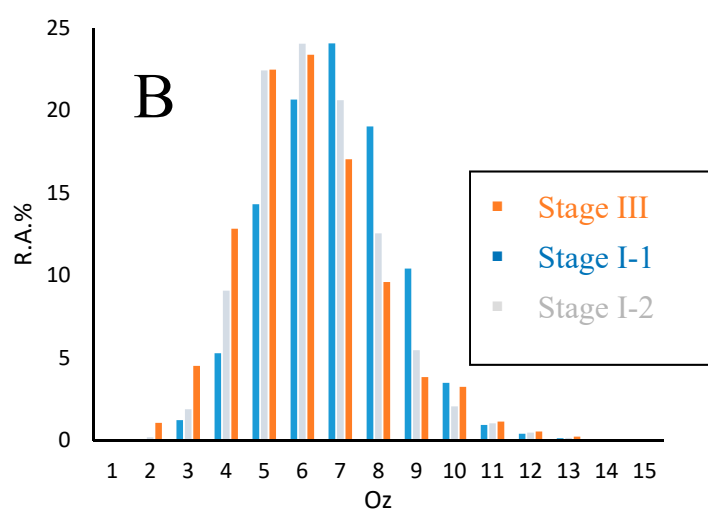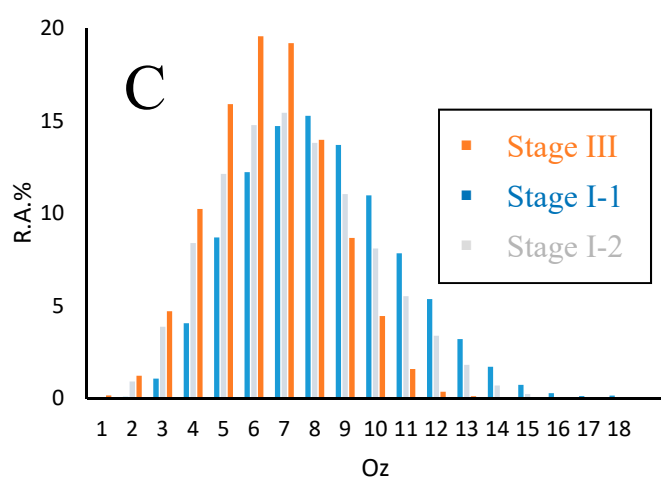

**Figure S1.** Analysis of pyrolysis liquids derived from softwood pellets produced at 550°C. Oxygen atom number distribution of compounds type  $C_xH_yO_z$  in three ionization modes for three samples produced under the same conditions, two being produced in the batch unit unit (Stage I) and one in the continuous unit (Stage III) with (A) ESI (-), (B) ESI (+) and (C) APPI (+).

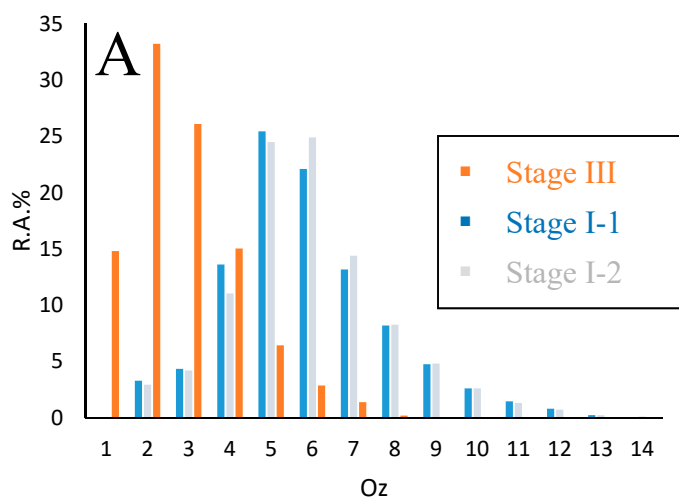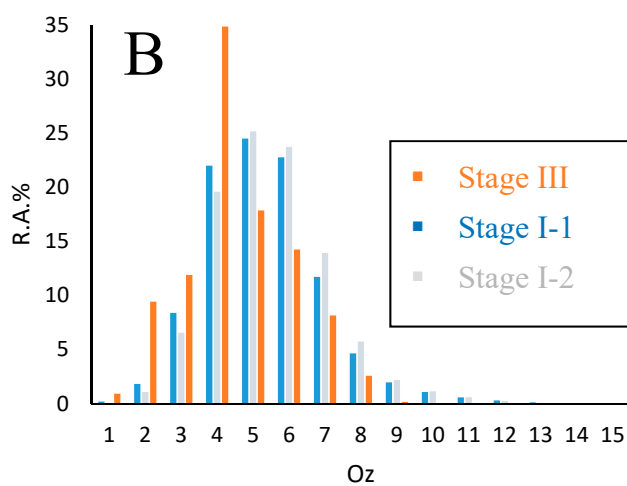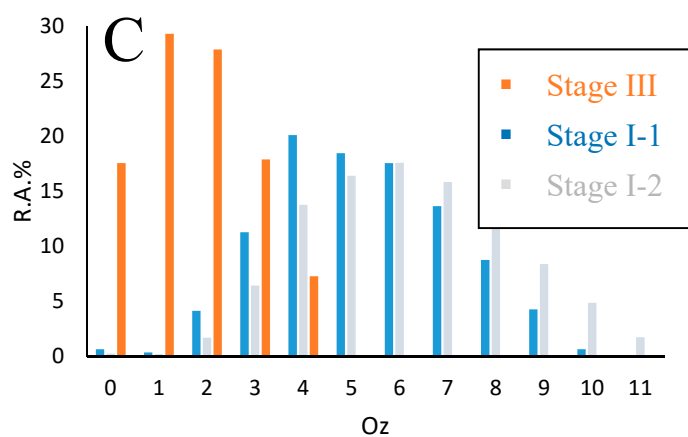

**Figure S2.** Analysis of pyrolysis liquids derived from wheat straw pellets produced at 550°C. Oxygen atom number distribution of compounds type  $C_xH_yO_z$  in three ionization modes for three samples produced under the same conditions, two being produced in the batch unit unit (Stage I) and one in the continuous unit (Stage III) with (A) ESI (-), (B) ESI (+) and (C) APPI (+).
